# Supplementary material for: A reconstruction of warm-water inflow to Upernavik Isstrøm since 1925 CE and its relation to glacier retreat
Source: Copernicus journal article supplement (doi:10.5194/cp-15-1171-2019), 2019-07-01
Supplement: Supplementary file 1 [file cp-15-1171-2019-supplement.pdf]

Supplement of *Clim. Past*, 15, 1171–1186, 2019  
<https://doi.org/10.5194/cp-15-1171-2019-supplement>  
© Author(s) 2019. This work is distributed under  
the Creative Commons Attribution 4.0 License.

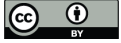

*Supplement of*

## **A reconstruction of warm-water inflow to Upernavik Isstrøm since 1925 CE and its relation to glacier retreat**

**Flor Vermassen et al.**

*Correspondence to:* Flor Vermassen (flv@geus.dk)

The copyright of individual parts of the supplement might differ from the CC BY 4.0 License.

## 14 Supplementary Figures

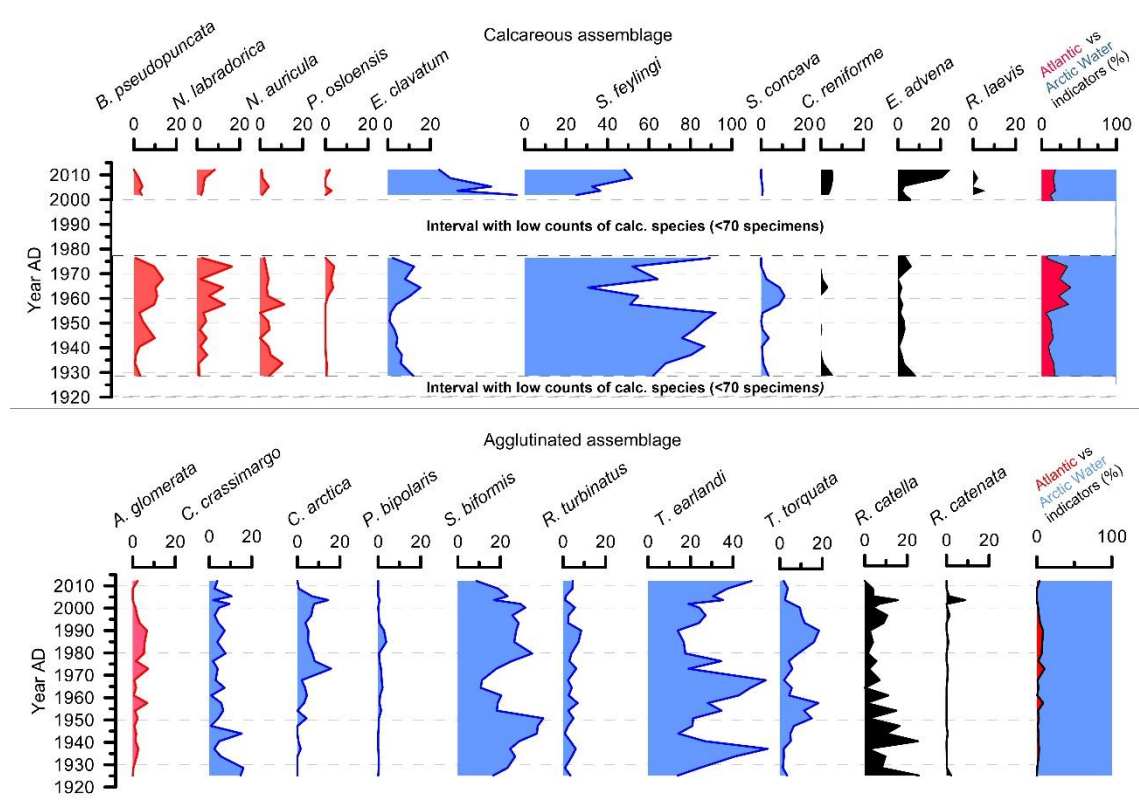

**Figure S1.** Abundances of calcareous species (top) and agglutinated (bottom) species in core POR13-05. Abundances are calculated relative to the calcareous (top) and agglutinated fauna (bottom), respectively. Red colors indicate (chilled) Atlantic water indicator species, blue colors represent Arctic water indicators. Intervals with <70 specimens are not displayed.

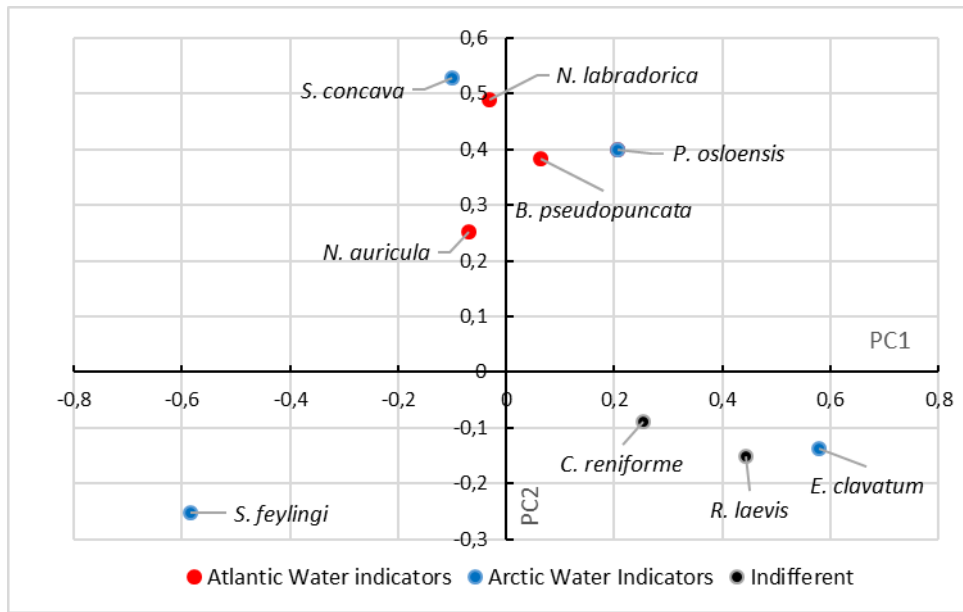

Figure S2. Loadings plot resulting from principal component analysis performed on the calcareous assemblage in POR13-05.

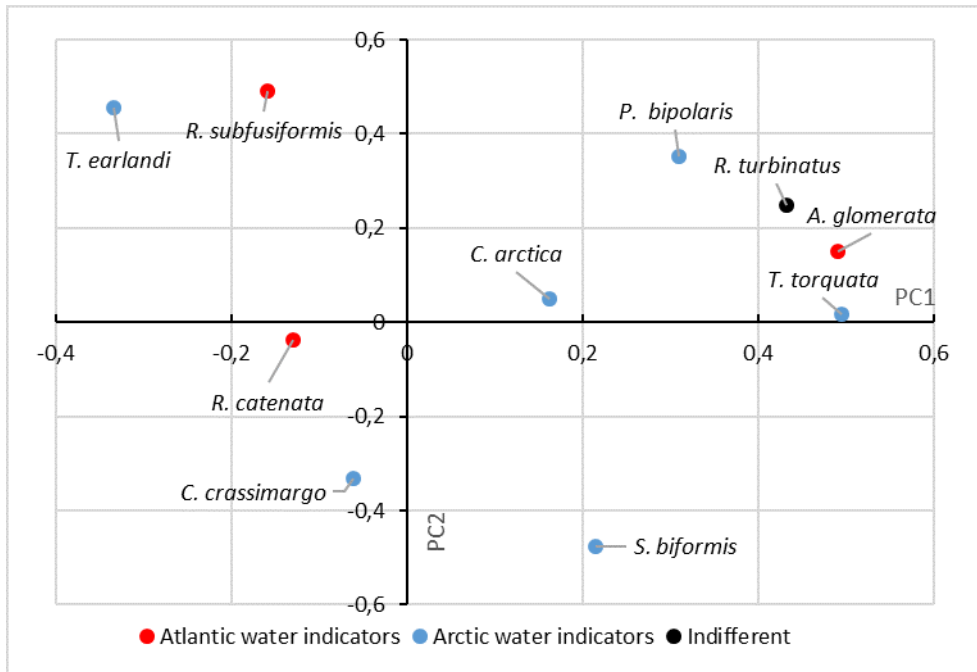

Figure S3. Loadings plot resulting from principal component analysis performed on the agglutinated assemblage in POR13-05.
